# Supplementary material
Source: ML conference proceedings conference paper supplement (https://proceedings.neurips.cc/paper_files/paper/2016/hash/de03beffeed9da5f3639a621bcab5dd4-Abstract.html)
Supplement: Supplementary file [file de03beffeed9da5f3639a621bcab5dd4-Supplemental.zip]

## Appendix

### Application to Natural Image Patches

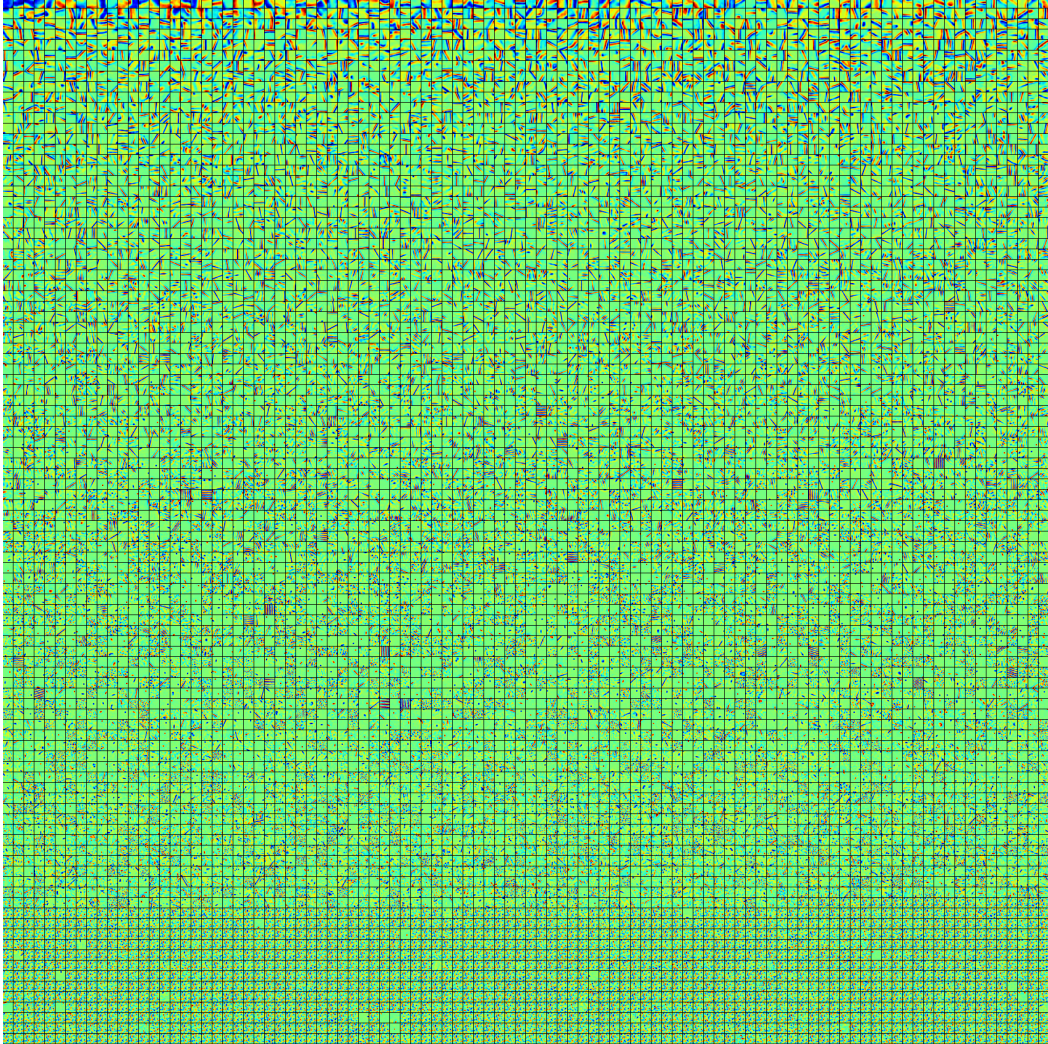

Figure 4: Image of all generative fields after S5C was applied with  $H = 10\,000$ . Latent components  $\bar{W}_h$  learned by the S5C algorithm. The components are sorted from left to right and top to bottom with respect to their posterior probabilities averaged over data points.

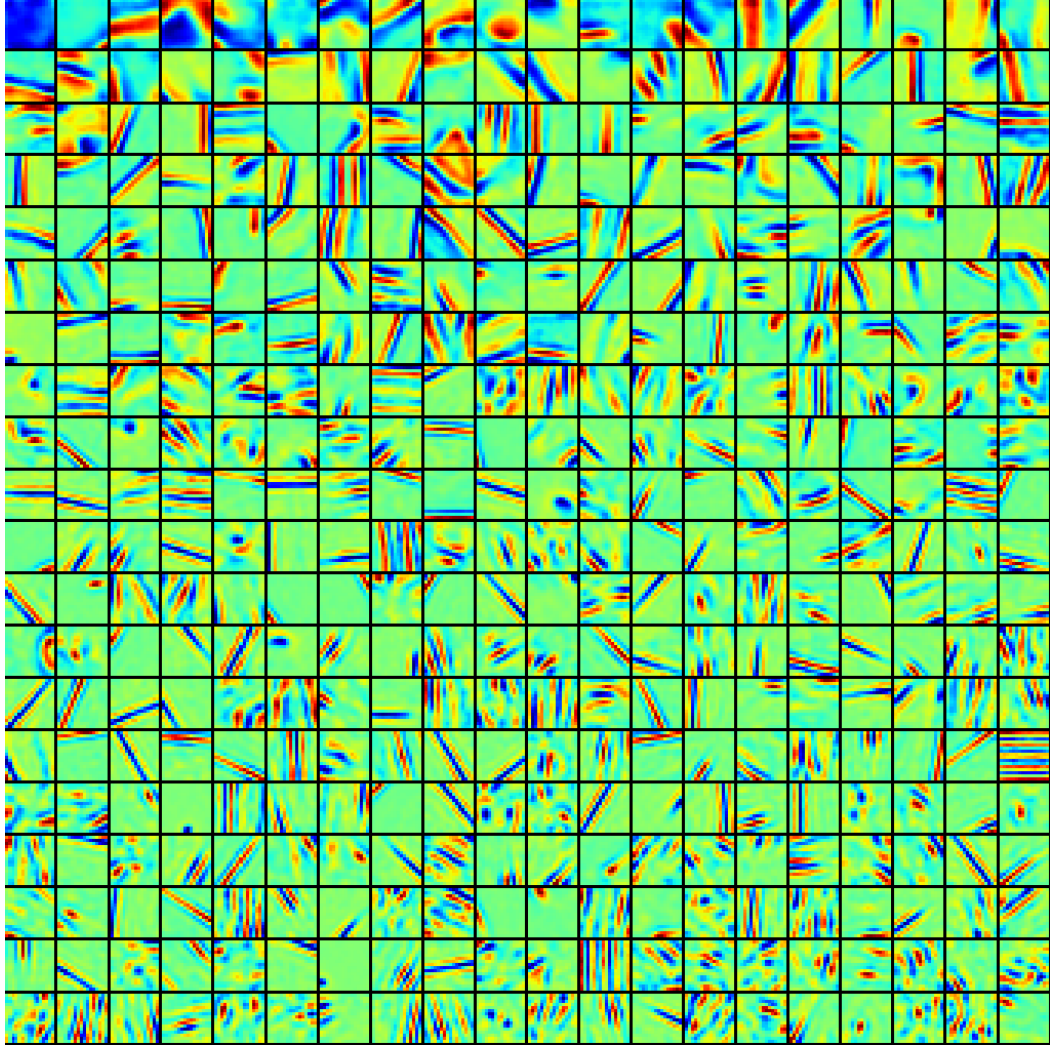

Figure 5: 400 of the 10 000 generative fields randomly selected for increase readability. Out of  $H = 10\,000$  learned components, we pick every 4<sup>th</sup> component for display starting with the most frequently activated fields. Here we show the first 400 such fields.
